# Supplementary material
Source: publisher site journal article supplement (https://www.spandidos-publications.com/5438/downloadSupplementary)

Figure S1. Effect of osmotic pressure on cell viability in ARPE19 cells. Data are presented as the mean  $\pm$  SD; n=3. \*P<0.05. HG, high glucose.

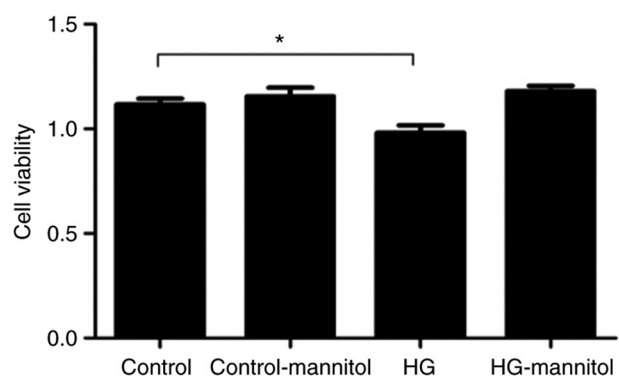

Supplement: Supplementary file 1 [file downloadSupplementary]
